# Supplementary material for: Quercetin 3,5,7,3′,4′-pentamethyl ether from Kaempferia parviflora directly and effectively activates human SIRT1
Source: PubMed Central journal article supplement (PMC7896056; doi:10.1038/s42003-021-01705-1), 2021-02-19
Supplement: 42003_2021_1705_MOESM2_ESM.pdf [file 42003_2021_1705_MOESM2_ESM.pdf]

## **Description of Additional Supplementary Files**

**File Name:** Supplementary Data 1

**Description:** The input data, R codes and output data of the statistical analyses in Figs. 8, 9 and Supplementary Fig. 1.

**File Name:** Supplementary Data 2

**Description:** The source data underlying the graphs in Figs. 5, 7, 8, 9 and Supplementary Figs. 1 and 2.

**File Name:** Supplementary Data 3

**Description:** The atomic coordinates data used in Fig. 6 and Supplementary Fig. 4.
